# Supplementary material for: Adsorptive denitrogenation of model oil by MOF(Al)@GO composites: remarkable adsorption capacity and high selectivity
Source: Royal Society of Chemistry journal article supplement (doi:10.1039/d2nj06032a), 2023-01-01
Supplement: d2nj06032a1.pdf [file d2nj06032a1.pdf]

## Adsorptive denitrogenation of model oil by Al-NDC@GO composites: Remarkable adsorption capacity and high selectivity

Xin Hu, Zareen Zuhra, Shafqat Ali, Yunshan Zhou\*, Lijuan Zhang\*, Xiaoya Duan, Zipeng Zhao  
State Key Laboratory of Chemical Resource Engineering, Institute of Science, Beijing University of Chemical Technology, Beijing, 100029, P. R. China

### Materials

The chemicals aluminum nitrate nonahydrate (analytical grade) and n-octane (analytical grade) were purchased from Tianjin Guangfu Technology Development Co. Ltd.; 1,4-naphthalenecarboxylic acid (1,4-H<sub>2</sub>NDC, 98 %), methanol (HPLC grade), pyridine (PY, 99.8 %), indole (IND, 99 %) and quinoline (QUI, 99 %) were purchased from Beijing Chemical Reagent Co. Ltd. These reagents were used as obtained. The Al-NDC MOF material was prepared according to the published method <sup>1</sup>. The graphene oxide (GO) was prepared with modified Hummer' method.<sup>2</sup>

### Apparatus

The Fourier Transform Infrared spectra (FT-IR) were recorded on a Nicolet FTIR-170SX spectrometer with KBr pellets in the range of 400-4000 cm<sup>-1</sup>. The powder X-ray diffraction (PXRD) data was collected on a Rigaku D/max 2500 X-ray diffractometer at a scanning rate of 10°/min in the 2θ range from 5° to 70° with graphite-monochromatic Cu K<sub>α</sub> radiation (λ = 0.15405 nm). SEM images and EDX data were obtained using scanning electron microscope Zeiss Supra55 at an accelerating voltage of 20 kV. The nitrogen adsorption and desorption isotherms were measured at 77 K on an ASAP-2020 (Micrometrics USA). The specific surface area (S<sub>BET</sub>) was determined from the linear part of the BET equation (P/P<sub>0</sub> = 0.05-0.3). The pore size distribution was derived from the desorption branch of the N<sub>2</sub> isotherm using the Barrett-Joyner-Halenda (BJH) method. The total pore volume was estimated from the amount of carbon dioxide adsorbed at a relative pressure (P/P<sub>0</sub>) of ca. 0.99. The nitrogen contents of the model oils were analyzed by Agilent HPLC 1100 Series with C-18 column, diameter 4.6 mm, length 250 mm, diameter of filler 5 μm, 10 % water and 90 % methanol as the initial mobile phase, gradient elution to 100 % methanol in 10 min with flow rate of 1.0 mL min<sup>-1</sup>.

### Adsorption calculations

#### Adsorbed amount

All the adsorption capacities (mg/g) were calculated from the difference between final concentration and initial concentration of an adsorbate by using following equation:

$$q_t = \frac{(C_i - C_f)}{M} \dots\dots\dots (\text{Eq. S1})$$

Where

$q_t$  = adsorbed amount in time t (mg/g)  
 $C_i$  = initial concentration of the adsorbate (mg/ml)  
 $C_f$  = final concentration of the adsorbate (mg/ml)  
 $V$  = volume of the solution subjected to a single adsorption (ml)  
 $M$  = mass of the adsorbent taken during a single adsorption (g)

**Maximum adsorption capacity**

The maximum adsorption capacity ( $Q_o$ ) was calculated using the Langmuir adsorption isotherm. The adsorption isotherms for different adsorbents were plotted according to the Langmuir equation <sup>3</sup>:

$$\frac{C_e}{q_e} = \frac{C_o}{Q_o} + \frac{1}{Q_o b} \dots\dots\dots \text{(Eq. S2)}$$

Where

$C_e$  = the equilibrium concentration of the adsorbate (mg/L)  
 $q_e$  = the amount adsorbed at the equilibrium (mg/g)  
 $Q_o$  = the Langmuir constant (maximum adsorption capacity mg/g)  
 $b$  = the Langmuir constant (L/mg)

Therefore, the maximum adsorption capacity,  $Q_o$  could be obtained from the reciprocal of the slope of a plot of  $C_e/q_e$  against  $C_e$ .

The separation factor ( $R_L$ ) was calculated using the following equation that describes the adsorption process <sup>4-7</sup>:

$$R_L = \frac{1}{1 + bC_o} \dots\dots\dots \text{(Eq. S3)}$$

Where

$R_L$  = separation factor  
 $b$  = the Langmuir constant (L/mg)  
 $C_o$  = initial concentration of adsorbate (mg/L)

Table S1. Comparison of the adsorptive denitrogenation capacities of different adsorbents in model oil system

| Adsorbent | Type of NCCs      | $Q_o$ (mg- NCC/g) | $Q_o$ (mg-N/g) | Reference |
|-----------|-------------------|-------------------|----------------|-----------|
| AC        | quinoline, indole | -                 | 39.0           | 8, 9      |

|                         |                          |     |      |           |
|-------------------------|--------------------------|-----|------|-----------|
| Cu-Y                    | NCCs with aromatic rings | -   | 3.0  | 10, 11    |
| Silica- Alumina         | Mixed                    | -   | 10.0 | 12, 13    |
| Alumina                 | quinoline, indole        | -   | 7.16 | 14        |
| Meso-silica             | Mixed                    | -   | 8.14 | 15        |
| MOF (MIL-101)           | Mixed                    | -   | 19.6 | 16, 17    |
| MIL-100 (Cr)            | quinoline, indole        | 445 | 49.4 | 18        |
| PVDF/MIL-101            | quinoline, indole        | 426 | 47.8 | 19, 20    |
| NH <sub>2</sub> -UiO-66 | Indole                   | 312 | 37.3 | 21, 22    |
| Al-NDC@GO-4             | Indole                   | 487 | 61.2 | This work |
|                         | Quinoline                | 670 | 72   | This work |
|                         | Pyridine                 | 533 | 86   | This work |

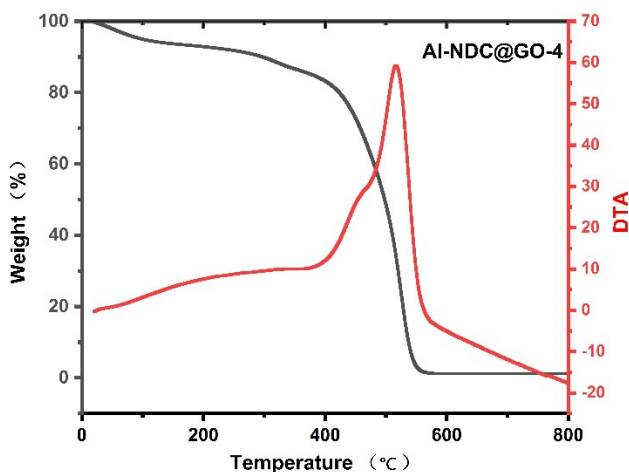

Fig.S1 TG-DTA patterns of Al-NDC@GO-4

Table S2. Fitting parameters of PY for Al-NDC and Al-NDC@GO-1/4 composites at different initial concentration

|          |                                            |
|----------|--------------------------------------------|
| Model    | ExpDec2                                    |
| Equation | $y = A1*\exp(-x/t1) + A2*\exp(-x/t2) + y0$ |

| Plot            | AI-NDC@GO-4           | AI-NDC                   | AI-NDC@GO-1             |
|-----------------|-----------------------|--------------------------|-------------------------|
| y0              | 9.59851E7 ± --        | 2859.01429 ± 1483.29052  | 287.32864 ± 508.63927   |
| A1              | -132.89031 ± 49.41997 | -20.88941 ± 3.03868      | -284.95494 ± 355.17732  |
| t1              | 30.96496 ± 25.86062   | 61.94119 ± 20.73591      | 305.61258 ± 418.64164   |
| A2              | 30.96496              | -2832.46812 ± 1481.2534  | 16.933 ± 143.6156       |
| t2              | 30.96496              | 15267.66607 ± 8475.76135 | -427.31376 ± 1068.11579 |
| Reduced Chi-Sqr | 30.96496              | 0.6284                   | 122.69596               |
| Pearson's r     | 30.96496              | 0.99999                  | 0.99924                 |
| Adj. R-Square   | 30.96496              | 0.99994                  | 0.99619                 |

**Table S3. Fitting parameters of QUI for AI-NDC and AI-NDC@GO-1/4 composites at different initial concentration**

| Model           | ExpDec2                                    |                |                         |
|-----------------|--------------------------------------------|----------------|-------------------------|
| Equation        | $y = A1*\exp(-x/t1) + A2*\exp(-x/t2) + y0$ |                |                         |
| Plot            | AI-NDC@GO-1                                | AI-NDC         | AI-NDC@GO-4             |
| y0              | 820.56574 ± 172.91105                      | 371.63142 ± 0  | 1169.39033 ± 634.56375  |
| A1              | -798.89357 ± 162.5462                      | -185.81571 ± 0 | -27.30787 ± 67.10747    |
| t1              | 2543.15298 ± 833.10218                     | 959.02428 ± 0  | 223.38163 ± 451.0617    |
| A2              | -22.27424 ± 15.81506                       | -185.81571 ± 0 | -1140.76049 ± 568.32601 |
| t2              | 52.66427 ± 112.15789                       | 1172.14078 ± 0 | 3216.55229 ± 2689.66709 |
| Reduced Chi-Sqr | 86.68652                                   | 0              | 16.26822                |
| Pearson's r     | 0.99891                                    | 0.98742        | 0.99977                 |
| Adj. R-Square   | 0.99745                                    | 0.99745        | 0.99946                 |

**Table S4. Fitting parameters of IND for AI-NDC and AI-NDC@GO-1/4 composites at different initial concentration**

| Model           | ExpDec2                                    |                       |                        |
|-----------------|--------------------------------------------|-----------------------|------------------------|
| Equation        | $y = A1*\exp(-x/t1) + A2*\exp(-x/t2) + y0$ |                       |                        |
| Plot            | AI-NDC                                     | AI-NDC@GO-1           | AI-NDC@GO-4            |
| y0              | 395.91618 ± 139.80485                      | 583.94769 ± 83.00155  | 600.36375 ± 57.53141   |
| A1              | -2.14043 ± 37.27259                        | -579.73485 ± 79.42152 | -595.18313 ± 54.46682  |
| t1              | 1.51164 ± 7.88388E10                       | 546.96224 ± 118.63307 | 417.96561 ± 67.09795   |
| A2              | -382.4472 ± 118.38024                      | 0.07714 ± 0.9534      | 0.10527 ± 0.85338      |
| t2              | 1403.51059 ± 995.89359                     | -225.7381 ± 390.74799 | -216.90134 ± 247.50623 |
| Reduced Chi-Sqr | 351.11986                                  | 140.50633             | 154.59956              |
| Pearson's r     | 0.99397                                    | 0.9985                | 0.99862                |
| Adj. R-Square   | 0.96983                                    | 0.9973                | 0.99752                |

**Table S5. Langmuir fitting parameters of PY for AI-NDC and AI-NDC@GO-1/4 composites at different initial concentration**

|          |               |
|----------|---------------|
| Equation | $y = a + b*x$ |
| Weight   | No Weighting  |

|                         |           |         |                |
|-------------------------|-----------|---------|----------------|
| Residual Sum of Squares | 1.74583   | 0.16018 | 0.15713        |
| Pearson's r             | 0.90531   | 0.96252 | 0.95932        |
| Adj. R-Square           | 0.77448   | 0.90806 | 0.90036        |
|                         |           | Value   | Standard Error |
| Al-NDC                  | Intercept | 2.35314 | 0.39698        |
|                         | Slope     | 0.00228 | 5.34735E-4     |
| Al-NDC@GO-1             | Intercept | 0.78418 | 0.11527        |
|                         | Slope     | 0.00147 | 2.0777E-4      |
| Al-NDC@GO-4             | Intercept | 0.26721 | 0.10855        |
|                         | Slope     | 0.0017  | 2.50102E-4     |

**Table S6. Langmuir fitting parameters of IND for Al-NDC and Al-NDC@GO-1/4 composites at different initial concentration**

|                         |                     |         |                |
|-------------------------|---------------------|---------|----------------|
| Equation                | $y = a + b \cdot x$ |         |                |
| Weight                  | No Weighting        |         |                |
| Residual Sum of Squares | 0.04548             | 0.51365 | 0.21979        |
| Pearson's r             | 0.99843             | 0.9556  | 0.91378        |
| Adj. R-Square           | 0.99528             | 0.8958  | 0.79373        |
|                         |                     | Value   | Standard Error |
| Al-NDC                  | Intercept           | 2.06682 | 0.13327        |
|                         | Slope               | 0.00218 | 8.64961E-5     |
| Al-NDC@GO-1             | Intercept           | 2.14348 | 0.18333        |
|                         | Slope               | 0.00121 | 1.67089E-4     |
| Al-NDC@GO-4             | Intercept           | 1.92354 | 0.15212        |
|                         | Slope               | 0.00117 | 2.59443E-4     |

**Table S7. Langmuir fitting parameters of QUI for Al-NDC and Al-NDC@GO-1/4 composites at different initial concentration**

|                         |                     |         |                |
|-------------------------|---------------------|---------|----------------|
| Equation                | $y = a + b \cdot x$ |         |                |
| Weight                  | No Weighting        |         |                |
| Residual Sum of Squares | 0.04548             | 0.51365 | 0.21979        |
| Pearson's r             | 0.99843             | 0.9556  | 0.91378        |
| Adj. R-Square           | 0.99528             | 0.8958  | 0.79373        |
|                         |                     | Value   | Standard Error |
| Al-NDC                  | Intercept           | 2.06682 | 0.13327        |
|                         | Slope               | 0.00218 | 8.64961E-5     |
| Al-NDC@GO-1             | Intercept           | 2.14348 | 0.18333        |
|                         | Slope               | 0.00121 | 1.67089E-4     |
| Al-NDC@GO-4             | Intercept           | 1.92354 | 0.15212        |
|                         | Slope               | 0.00117 | 2.59443E-4     |

## References

1. A. Comotti, S. Bracco, P. Sozzani, S. Horike, R. Matsuda, J. Chen, M. Takata, Y. Kubota and S. Kitagawa, *J. Am. Chem. Soc.*, 2008, **130**, 13664-13672.
2. T. Chen, B. Zeng, J. L. Liu, J. H. Dong, X. Q. Liu, Z. Wu, X. Z. Yang and Z. M. Li, *J. Phys.:Conf. Ser.*, 2009, **188**, 012051.
3. Y. S. Ho and G. McKay, *Process Biochem.*, 1999, **34**, 451-465.
4. B. H. Hameed and A. A. Rahman, *J. Hazard. Mater.*, 2008, **160**, 576-581.
5. S. Lin and R. Juang, *J. Environ. Manage.*, 2009, **90**, 1336-1349.
6. K. P. Singh, D. Mohan, S. Sinha, G. S. Tondon and D. Gosh, *Ind. Eng. Chem. Res.*, 2003, **42**, 1965-1976.
7. Z. Ni, S. Xia, L. Wang, F. Xing and G. Pan, *J. Colloid Interf. Sci.*, 2007, **316**, 284-291.
8. Y. Hu, N. Li, J. Jiang, Y. Xu, X. Luo and J. Cao, *Front. Env. Sci. Eng.*, 2021, **16**, 90.
9. N. Li, M. Almarri, X. Ma and Q. Zha, *New Carbon Mater.*, 2011, **26**, 470-478.
10. P. J. Jodłowski, I. Czekaj, P. Stachurska, Ł. Kuterasiński, L. Chmielarz, R. J. Jędrzejczyk, P. Jeleń, M. Sitarz, S. Górecka, M. Mazur and I. Kurzydym, *Catalysts*, 2021, **11**, 824.
11. Y. Wu, J. Xiao, L. Wu, M. Chen, H. Xi, Z. Li and H. Wang, *J. Phys. Chem. C*, 2014, **118**, 22533-22543.
12. Q. Meng, A. Wang, C. Liu, E. Wang, A. Duan, Z. Zhao and G. Jiang, *Fuel*, 2022, **326**, 125084.
13. Y. Bae, M. Kim, H. Lee, C. Lee and J. Ryu, *AIChE J.*, 2006, **52**, 510-521.
14. X. Wei, J. Miao, Z. Lv, X. Wan, N. Zhang, R. Zhang and S. Peng, *Appl. Sci.*, 2022, **12**, 2309.
15. J. You, H. Song, J. Zhang, C. Chen and F. Han, *Fuel*, 2019, **241**, 997-1007.
16. I. Ahmed, N. A. Khan and S. H. Jhung, *Inorg. Chem.*, 2013, **52**, 14155-14161.
17. M. M. H. Mondol, B. N. Bhadra, J. M. Park and S. H. Jhung, *Chem. Eng. J.*, 2021, **404**, 126491.
18. M. Songolzadeh, M. Soleimani and M. Takht Ravanchi, *Micropor. Mesopor. Mat.*, 2019, **274**, 54-60.
19. I. Ahmed, N. A. Khan, Z. Hasan and S. H. Jhung, *J. Hazard. Mater.*, 2013, **250-251**, 37-44.
20. L. Ni, Y. Zhu, J. Ma and Y. Wang, *Water Res.*, 2021, **188**, 116554.
21. G. W. Peterson, J. J. Mahle, J. B. DeCoste, W. O. Gordon and J. A. Rossin, *Angew.Chem.Int.Edit.*, 2016, **55**, 6235-6238.
22. H. Fakhri, A. Esrafil, M. Farzadkia, R. Boukherroub, V. Srivastava and M. Sillanpää, *New J. Chem.*, 2021, **45**, 10897-10906.
